# Supplementary material for: Molecular Mechanisms of Oxygen Evolution Reactions for Artificial Photosynthesis
Source: Preprints.org preprint supplement (doi:10.20944/preprints202309.0071.v1), 2023-09-01
Supplement: Supplementary file 1 [file supplementary]

## Sheet: Sheet1
Figure No.	Ref.No.	Journal,year	Publisher	DOI	Copyright
1	16	Nature 2023	Nature.com	DOI: 10.1038/s41586-023-06008-5	CCA4.0
2	16	Nature 2023	Nature.com	DOI: 10.1038/s41586-023-06008-5	CCA4.0
3			Original Drawing
4	112	Energy Environ. Sci. 2021	Royal Society of Chemistry	https://doi.org/10.1039/D1EE01277K	Author	Reproduced from Ref. XX with permission from the Royal Society of Chemistry.
5	113	Catalysts 2022	MDPI	doi.org/10.3390/catal12121557
6	120	J. Am. Chem. Soc. 2005	American Chemical Society	https://doi.org/10.1021/ja053252e		Reproduced from Ref. XX with permission from the American Chemical Society
7	135	ACS Catal. 2021	American Chemical Society	https://doi.org/10.1021/acscatal.1c03256
8	138	J. Phys. Chem. C 2021	American Chemical Society	https://doi.org/10.1021/acs.jpcc.1c01755
9	143	J. Am. Chem. Soc. 2017	American Chemical Society	https://doi.org/10.1021/jacs.6b09550
10	172	Nanoscale, 2020	Royal Society of Chemistry	https://doi.org/10.1039/D0NR02410D
11	177	ACS Catal. 2022	American Chemical Society	https://doi.org/10.1021/acscatal.2c01241
12	191	ACS Catal. 2023	American Chemical Society	https://pubs.acs.org/doi/10.1021/acscatal.2c06339
13	200	J. Am. Chem. Soc. 2022	American Chemical Society	https://doi.org/10.1021/jacs.1c08152
14	89	J. Am. Chem. Soc. 2018	American Chemical Society	https://doi.org/10.1021/jacs.7b10979
15	68	iScience, 2018	Elsevier ©The Authors.	https://doi.org/10.1016/j.isci.2018.05.018	CC BY 4.0	Reproduced from Ref. XX with permission from Elsevier
16	233	ACS Nano, 2023,	American Chemical Society	https://doi.org/10.1021/acsnano.3c00893
17	249	Adv. Sci. 2018	John Wiley & Sons, Inc	DOI: 10.1002/advs.201801029	CC BY 4.0	Reproduced from Ref. XX with permission from Wiley‐VCH
18	258	RSC Adv. 2023	Royal Society of Chemistry	DOI: 10.1039/d3ra00648d
19	261	ACS Catal. 2022	American Chemical Society	https://doi.org/10.1021/acscatal.2c03020		Reproduced from Ref. XX with permission from the American Chemical Society
20	267	J. Phys. Chem. Lett. 2017	American Chemical Society	https://doi.org/10.1021/acs.jpclett.7b01504
					CCA4.0=Creative Commons Attribution 4.0 International License
